RESEARCH ARTICLE

# Comparison of Combined General-Epidural Anesthesia with General Anesthesia Effects on Survival and Cancer Recurrence: A Meta-Analysis of Retrospective and Prospective Studies

Lijian Pei<sup>1</sup>✉, Gang Tan<sup>1</sup>✉, Lei Wang<sup>1</sup>, Wenjuan Guo<sup>1</sup>, Bo Xiao<sup>1</sup>, Xianli Gao<sup>1</sup>, Li Wang<sup>2</sup>, Hong Li<sup>1</sup>, Zhonghuang Xu<sup>1</sup>, Xiuhua Zhang<sup>1</sup>, Jing Zhao<sup>1</sup>, Jie Yi<sup>1</sup>, Yuguang Huang<sup>1\*</sup>

1. Department of Anesthesiology, Peking Union Medical College Hospital, Chinese Academy of Medical Sciences, Beijing 100730, PR China, 2. Department of Epidemiology & Biostatistics, Institute of Basic Medical Sciences, Chinese Academy of Medical Sciences & School of Basic Medicine Peking Union Medical College, Beijing 100005, PR China

\*[hyug1999@163.com](mailto:hyug1999@163.com)

✉ These authors contributed equally to this work.

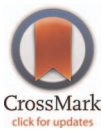

 OPEN ACCESS

**Citation:** Pei L, Tan G, Wang L, Guo W, Xiao B, et al. (2014) Comparison of Combined General-Epidural Anesthesia with General Anesthesia Effects on Survival and Cancer Recurrence: A Meta-Analysis of Retrospective and Prospective Studies. PLoS ONE 9(12): e114667. doi:10.1371/journal.pone.0114667

**Editor:** Daqing Ma, Imperial College London, Chelsea & Westminster Hospital, United Kingdom

**Received:** July 3, 2014

**Accepted:** November 12, 2014

**Published:** December 30, 2014

**Copyright:** © 2014 Pei et al. This is an open-access article distributed under the terms of the [Creative Commons Attribution License](https://creativecommons.org/licenses/by/4.0/), which permits unrestricted use, distribution, and reproduction in any medium, provided the original author and source are credited.

**Data Availability:** The authors confirm that all data underlying the findings are fully available without restriction. All relevant data are within the paper.

**Funding:** The authors have no support or funding to report.

**Competing Interests:** The authors have declared that no competing interests exist.

## Abstract

**Objective:** Animals underwent combined general-epidural anesthesia (EGA) is reported to have better long-time outcome than general anesthesia (GA). This study aimed to make overall evaluation of the association between these two anesthetic techniques and prognosis of cancer patients undergoing surgery.

**Methods:** Related databases such as PubMed and EMBASE were searched for eligible studies that evaluated the influence of EGA and GA on the prognosis of cancer patients undergoing surgery. Selected studies were evaluated according to the inclusion criteria by two reviewers respectively, followed by data extraction and quality assessment. The odds ratio (OR) with their 95% confidence intervals (CIs) were calculated to assess the influence strength of EGA and GA on prognosis of cancer patients.

**Results:** A total of ten studies involving 3254 patients were included. The overall results demonstrated that there was no significant difference between EGA and GA group (OR=0.88, 95% CI 0.73 to 1.06, P=0.187) concerning postoperative recurrence and metastasis rate. In regard to the following two factors: cancer category and time of follow-up, subgroup analysis identified significant differences between EGA and GA in the group of patients with prostate cancer and the group with follow-up less than or equal to two years (OR=0.66, 95% CI 0.46 to 0.95,

$P=0.027$ ;  $OR=0.70$ , 95% CI 0.51 to 0.98,  $P=0.035$ ; respectively) concerning postoperative recurrence and metastasis rate. However, no significant difference was found in the group of patients with colorectal cancer ( $OR=1.06$ , 95% CI 0.84–1.33,  $P=0.62$ ).

**Conclusions:** This meta-analysis showed that EGA might be associated with improvement in prognosis of patients with operable prostate cancer and the cancer patients with follow-up less than or equal to two years. However, no obvious relationship between the improvement in prognosis of colorectal cancer and EGA were detected, comparing to GA. Furthermore, all the results should be interpreted cautiously, as heterogeneous data were used for analyzing.

## Introduction

Recently, considerable numbers of studies have reported that the anesthetic technique applied during oncologic surgery could affect the recurrence and metastasis of cancer, for example, combined general and regional anesthesia is proved to be able to improve the postoperative prognosis of prostate cancer (epidural analgesia) and breast cancer (paravertebral block) [1,2]. The potential bases of this intriguing hypothesis lies on the effect of anesthetic technique or specific anesthetic drug on the immune response and tumor cell biology in cancer patients, which may consequently affect the oncological outcome, including recurrence and metastasis after surgery [3].

Epidural anesthesia (EA) could reduce the incidence of side-effects and the occurrence possibility of immunosuppressive factors, as well as provide better postoperative pain relief [4]. Moreover, animal models also demonstrated that EA would significantly attenuate the stress response during surgery through preserving immune response ability, leading to better long-time outcome [5]. There is a hypothesis that perioperative EA could improve perioperative immune suppression and enhance immune surveillance in patients with cancer, and thus reduce cancer recurrence and metastasis. Previous retrospective studies on breast and prostate cancer patients have supported this hypothesis [6,7]. However, some recent retrospective studies showed that EA could not bring obvious improved oncologic outcomes in patients with prostate, colorectal, and breast cancers [8–13].

The combined general-epidural anesthesia (EGA) is frequently applied in major thoracic or abdominal surgery [14]. Nizamoglu et al demonstrated that EGA performed on adrenal tumor patients undergoing laparoscopic adrenalectomy was a relatively effective and safe anesthetic method, which could help maintain normal hormone level [15]. Kaneda et al showed that the blood pressure of patient with pheochromocytoma could be effectively controlled with the use of EGA [16]. Sotunmbi et al found that patients needed less medication and their hemodynamics was stable after surgical resection of giant pheochromocytoma by

using EGA [17]. As for larynx or hypopharynx and gastro-esophageal cancer, EGA was proved to contribute in the significantly reduced cancer recurrence and prolonged cancer-free survival [18, 19]. Nevertheless, Wuethrich et al showed that there was no significant survival improvement in prostate cancer patients who underwent retropubic radical prostatectomy using EGA [15]. Due to the limited sample size and other variation factors, the results of these publications are conflicting rather than conclusive. In order to provide further evidence that the combination of EA and GA might be related with decreased likelihood of cancer recurrence after tumor resection and thus improve overall survival, we conducted this comprehensive meta-analysis.

## Materials and Methods

### Literature search

Related databases such as PubMed, EMBase were searched for relevant studies using the following key words: “anesthetic technique” or “general anesthesia” or “epidural anesthesia” or “regional anesthesia”, and “cancer” or “carcinoma” or “neoplasm”, and “survival” or “recurrence” or “metastasis”. The last computerized literature search was in March 2014 and without language restriction. Bibliographies of retrieved publications were also examined for additional literatures. We first identified 585 potentially relevant papers with this search strategy, and then screened 290 possibly eligible papers by reviewing their titles. After scanning the abstract, 26 studies were identified for further screening by reading the full text.

### Criteria for inclusion

The publications included in our meta-analysis should meet the following criteria: 1) they were independent prospective or retrospective case-control studies; 2) the effect of combination of EA and GA on oncological outcome (cancer-free survival or cancer recurrence or metastasis) was used to compare with that of GA alone in cancer surgery; 3) studies showed sufficient useful data to calculate odds ratio (OR) with its 95% confidence intervals (CI). Reviews, meta-analyses and the studies did not provide sufficient data were excluded. After reading full text of all the possibly eligible publications, we finally identified 10 studies for our comprehensive meta-analysis.

### Quality assessment

Two experienced investigators (LJP and GT) independently evaluated the quality of the eligible studies based on the detailed data of included studies. Any discrepancy was subsequently settled by consultation. The quality of studies was assessed and quantified using the 9-star Newcastle-Ottawa Scale [20]. Besides, we followed the published PRISMA statement for reporting systematic reviews and meta-analyses of studies that evaluate health care interventions [21].

## Data extraction

Two experienced investigators (LJP and GT) independently performed the data extraction. The following detailed data were collected from each study: the surname of first author, the year of publication, cancer type, design type, survival, numbers in EGA, numbers in GA and numbers of cancer patients with recurrence or metastasis.

## Statistical analysis

In this meta-analysis, the software Stata 12.0 (Stata Corporation, College Station, TX, USA) was used to pool the results of eligible studies. The OR with its 95% CI was used to evaluate the influence strength of EGA and GA on the prognosis of cancer patients for each study. The heterogeneity among the independent studies was evaluated by Q statistics and  $I^2$  statistics, and it is considered to be heterogeneous if  $P$ -value  $< 0.05$  or  $I^2 > 50\%$  [22]. The fixed effects model would be adopted if there was no heterogeneity among studies, otherwise, the random effects model would be used. We used Begg's funnel plot and Egger's linear test to visually examine the potential publication bias. A symmetrical plot and  $P$ -value of Egger's test ( $> 0.05$ ) suggested that there was no publication bias in all studies. To make a comprehensive analysis, we also conducted stratified analysis by cancer type and the follow-up years. Sensitivity analysis was performed by omitting one study each time to detect extreme values.

## Results

### Basic characteristics

After comprehensive search in the databases, we finally identified 10 eligible studies, including 1351 cases in the EGA group and 1903 cases in the GA group [1, 2, 6, 11, 13, 15, 23–26]. The flowchart for literature search is displayed in Fig. 1. Cancer recurrence or metastasis was considered as the end point event. The basic characteristics of studies are shown in Table 1 and Table 2. The quality of each study was graded as level 2 (6 to 9) according to the 9-star Newcastle-Ottawa Scale. Four types of cancer such as breast cancer, prostate cancer, colorectal cancer and gastro-esophageal cancer were included in this study. Four studies were with regard to colorectal cancer, four studies were concerned with prostate cancer, with the other two literatures was related to breast cancer and gastro-esophageal cancer, respectively.

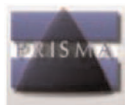

PRISMA 2009 Flow Diagram

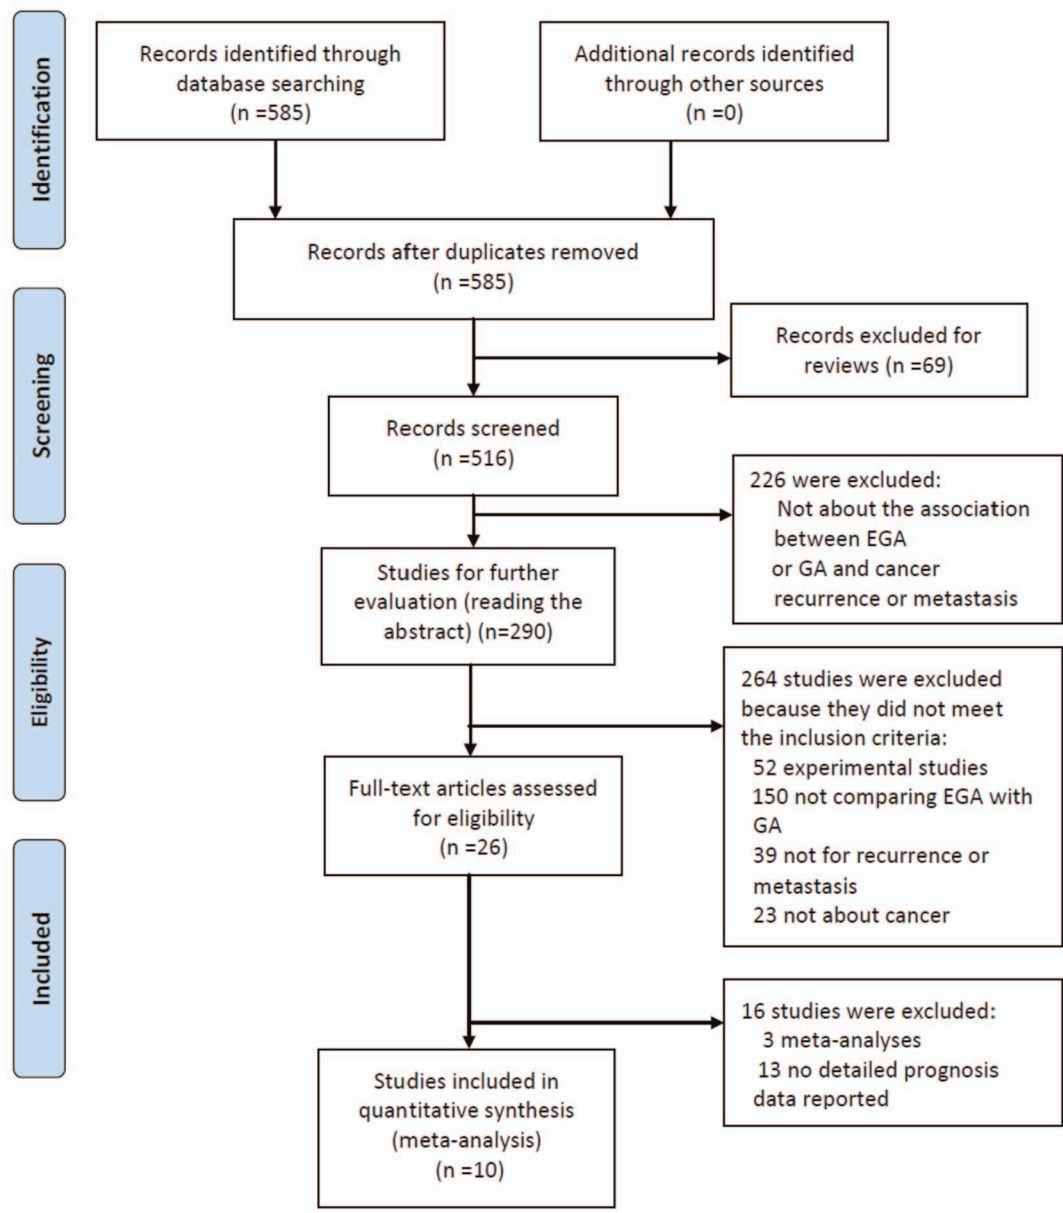

Fig. 1. Flowchart of included and excluded studies.

doi:10.1371/journal.pone.0114667.g001

**Table 1.** Basic characteristics of included studies.

| Authors               | Cancer type              | Design type   | Survival                  | Quality* |
|-----------------------|--------------------------|---------------|---------------------------|----------|
| Exadaktylos (2006)    | Breast cancer            | Retrospective | Recurrence-free survival  | 7        |
| Biki (2008)           | Prostate cancer          | Retrospective | Recurrence-free survival  | 6        |
| Christopherson (2008) | colon cancer             | Prospective   | Overall survival          | 7        |
| Gottschalk (2010)     | Colorectal cancer        | Retrospective | Recurrence-free survival  | 7        |
| Luo (2010)            | colon cancer             | Retrospective | Recurrence-free survival  | 7        |
| Tsui (2010)           | Prostate cancer          | Prospective   | Disease-free survival     | 6        |
| Wuethrich (2010)      | Prostate cancer          | Retrospective | Progression-free survival | 7        |
| Gupta (2011)          | Colon cancer             | Retrospective | Overall survival          | 6        |
| Wuethrich (2013)      | Prostate cancer          | Retrospective | Overall survival          | 7        |
| Hiller (2014)         | Gastro-esophageal cancer | Retrospective | Overall survival          | 7        |

\*evaluated by the 9-star Newcastle-Ottawa Scale; EGA: epidural anesthesia combined with general anesthesia; GA: general anesthesia.

doi:10.1371/journal.pone.0114667.t001

**Table 2.** Basic characteristics of included studies (Number of events).

| Authors                     | Events (n) | EGA (n) | Events (n) | GA (n) |
|-----------------------------|------------|---------|------------|--------|
| Exadaktylos (2006)          | 3          | 50      | 19         | 79     |
| Biki (2008)                 | 15         | 102     | 43         | 123    |
| Christopherson (2008)       | 45         | 85      | 56         | 92     |
| Gottschalk (2010)           | 34         | 256     | 40         | 253    |
| Luo (2010)                  | 42         | 182     | 155        | 931    |
| Tsui (2010)                 | 11         | 49      | 17         | 50     |
| Wuethrich (2010)            | 12         | 103     | 20         | 158    |
| Gupta (2011)                | 129        | 562     | 20         | 93     |
| Wuethrich (2013)            | 14         | 67      | 18         | 81     |
| Hiller (2014)               | 32         | 97      | 17         | 43     |
| Follow-up less than 2 years |            |         |            |        |
| Exadaktylos (2006)          | 3          | 50      | 19         | 79     |
| Biki (2008)                 | 1          | 102     | 5          | 123    |
| Christopherson (2008)       | 11         | 73      | 15         | 79     |
| Gottschalk (2010)           | 34         | 256     | 40         | 253    |
| Tsui (2010)                 | 3          | 49      | 5          | 50     |
| Hiller (2014)               | 32         | 97      | 17         | 43     |

Events: cancer recurrence or metastasis.

doi:10.1371/journal.pone.0114667.t002

## Quantitative data synthesis

### • Association between EGA and overall cancer recurrence or metastasis

Overall recurrence rates for cancer patients were 21.70% (337/1553) and 21.28% (405/1903) in EGA and GA group respectively. No apparent heterogeneity was detected (chi-squared=15.50,  $P=0.078$ ,  $I^2=41.9\%$ ), so fixed effects model was used to calculate the combined OR and 95% CI. The pooled results demonstrated that EGA did not decrease cancer recurrence or metastasis in comparison with GA alone (OR=0.88, 95% CI=0.73–1.06,  $Z=1.32$ ,  $P=0.187$ , [Fig. 2A](#)).

### • Association between EGA and colorectal cancer recurrence or metastasis

As there were different types of cancer were included in this study, stratified analysis was performed. Overall recurrence or metastasis rates for colorectal patients were 23.04% (250/1085) and 19.80% (271/1369) in EGA and GA group respectively. No significant heterogeneity was found (chi-squared=3.45,  $P=0.328$ ,  $I^2=13.0\%$ ), and fixed effects model was utilized to calculate the pooled OR and 95% CI. The combined results suggested that EGA did not reduce the colorectal cancer recurrence or metastasis in comparison with GA alone (OR=1.06, 95% CI=0.84–1.33,  $Z=0.50$ ,  $P=0.620$ , [Fig. 2B](#)).

### • Association between EGA and prostate cancer recurrence or metastasis

Total 4 eligible studies reported the prognosis data of prostate cancer patients, which was used for the stratified analysis. Overall recurrence or metastasis rates for patients with prostate cancer were 16.20% (52/321) and 23.79% (98/412) for EGA and GA group respectively. No significant heterogeneity was found (chi-squared=3.43,  $P=0.329$ ,  $I^2=12.6\%$ ), and fixed effects model was used to conduct this meta-analysis. The overall results suggested that EGA could obviously decrease the prostate cancer recurrence or metastasis compared with GA alone (OR=0.66, 95% CI=0.46–0.95,  $Z=2.21$ ,  $P=0.027$ , [Fig. 2C](#)).

### • Association between EGA and recurrence or metastasis of cancer with follow-up less than or equal to two years

As is known, complications usually turn up within 2 years post-surgery. Therefore, to investigate the short term effect of anesthesia on survival, it is necessary to conduct a subgroup analysis of patients with less than or equal to two years follow-up. The overall recurrence or metastasis rates for cancer patients with follow-up less than or equal to two years were 13.40% (84/627) and 16.11% (101/627) for EGA and GA group respectively. No heterogeneity was found among all studies (chi-squared=4.36,  $P=0.499$ ,  $I^2=0\%$ ), and fixed effects model was

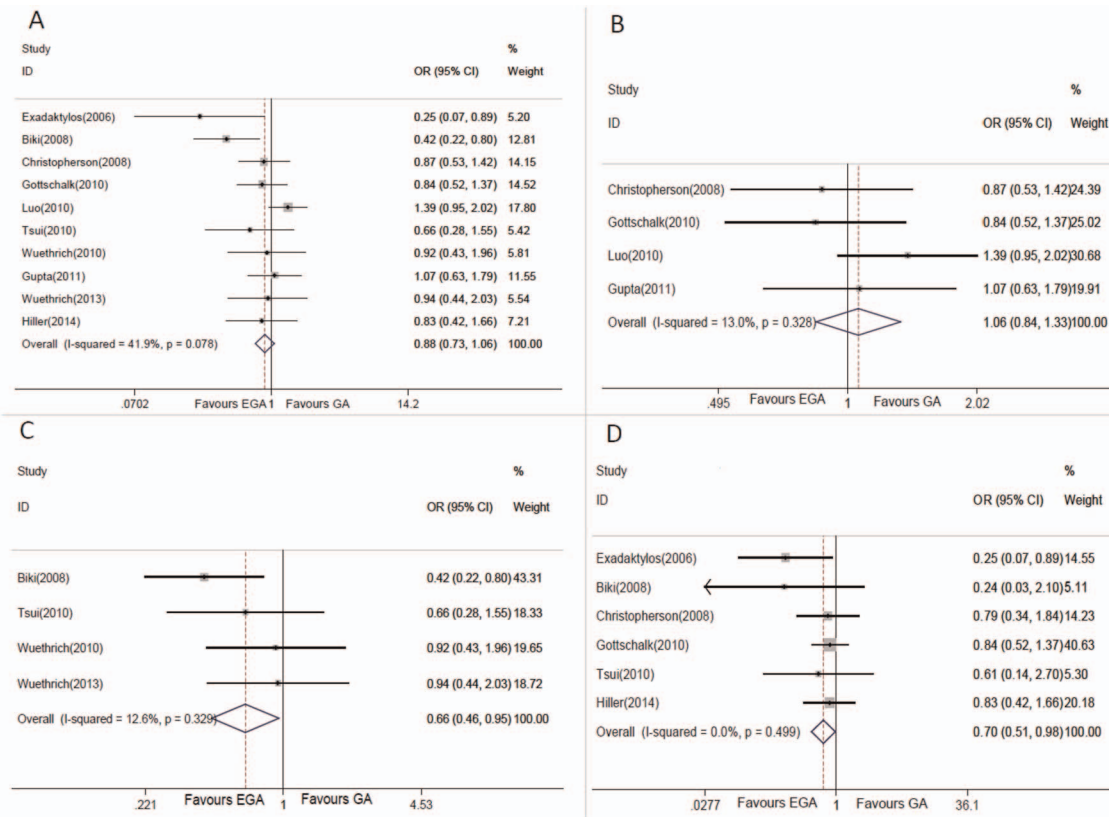

**Fig. 2. Forest plots showing the association between EGA and cancer recurrence or metastasis.** A. overall cancer; B. colorectal cancer; C. prostate cancer; D. cancer with follow-up less than or equal to two years.

doi:10.1371/journal.pone.0114667.g002

adopted. The pooled results demonstrated that EGA could significantly decrease the cancer recurrence or metastasis with follow-up less than or equal to two years in comparison with GA alone (OR=0.70, 95% CI=0.51–0.98, Z=2.11, P=0.035, [Fig. 2D](#)).

### Sensitivity analysis

The root of heterogeneity was assessed by sensitivity analysis, and no apparent heterogeneity was detected as described above. Besides, the pooled OR was not affected by any individual study, as shown in sensitivity analyses, which demonstrated that the results of our meta-analysis were robust and stable ([Fig. 3](#)).

### Publication bias

We examined publication bias through graphical inspection and quantitative evaluation. Neither Begg’s funnel plot nor Egger’s test demonstrated the presence of publication bias in colorectal cancer group (Begg’s test P=1.000; Egger’s test t=-2.21, P=0.158) ([Fig. 4A](#)), prostate cancer group (Begg’s test P=0.734; Egger’s



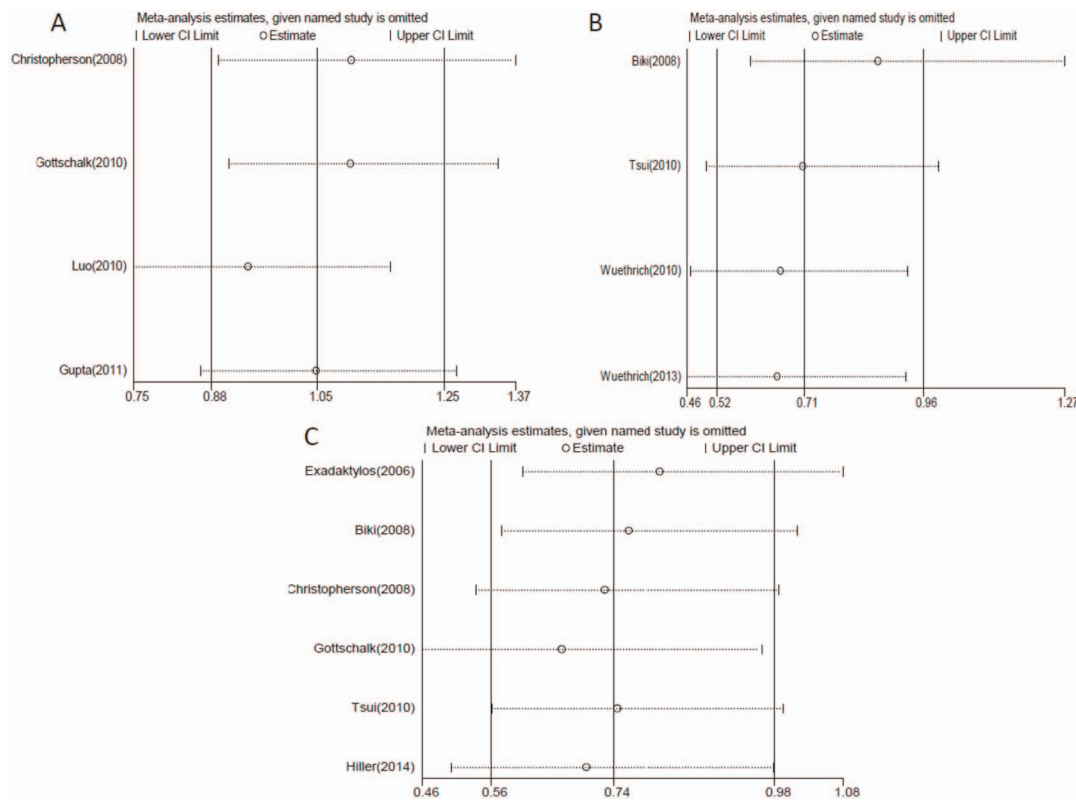

**Fig. 3. Sensitivity analyses for included studies.** A. all studies concerning colorectal cancer; B. all studies concerning prostate cancer; C. studies with follow-up less than or equal to two years.

doi:10.1371/journal.pone.0114667.g003

test  $t=1.32$ ,  $P=0.318$ ) (Fig. 4B), and group with follow-up less than or equal to two years (Begg’s test  $P=0.060$ ; Egger’s test  $t=-2.61$ ,  $P=0.059$ ) (Fig. 4C).

## Discussion

This meta-analysis was not able to prove a favorable correlation between EGA and overall cancer recurrence. The same result was found in subgroup analysis of colorectal cancer. However, within the subgroup of prostate cancer patients and subgroup with follow-up less than or equal to two years, an effective perioperative anesthesia combining epidural with general was revealed to be associated with cancer-free survival benefit. Our results from comprehensive meta-analysis were in coincidence with most, even not all, results from recently reported studies [18, 27]. These results are crucial considerations for subsequent prospective studies investigating the intriguing prospect of appropriate perioperative EGA modifying cancer recurrence.

Although cancer recurrence and metastasis may be associated with immunosuppressive factors such as anesthetic drugs, opioids and surgical stress, EA may promote tumor surveillance with less systemic immunosuppressive factors

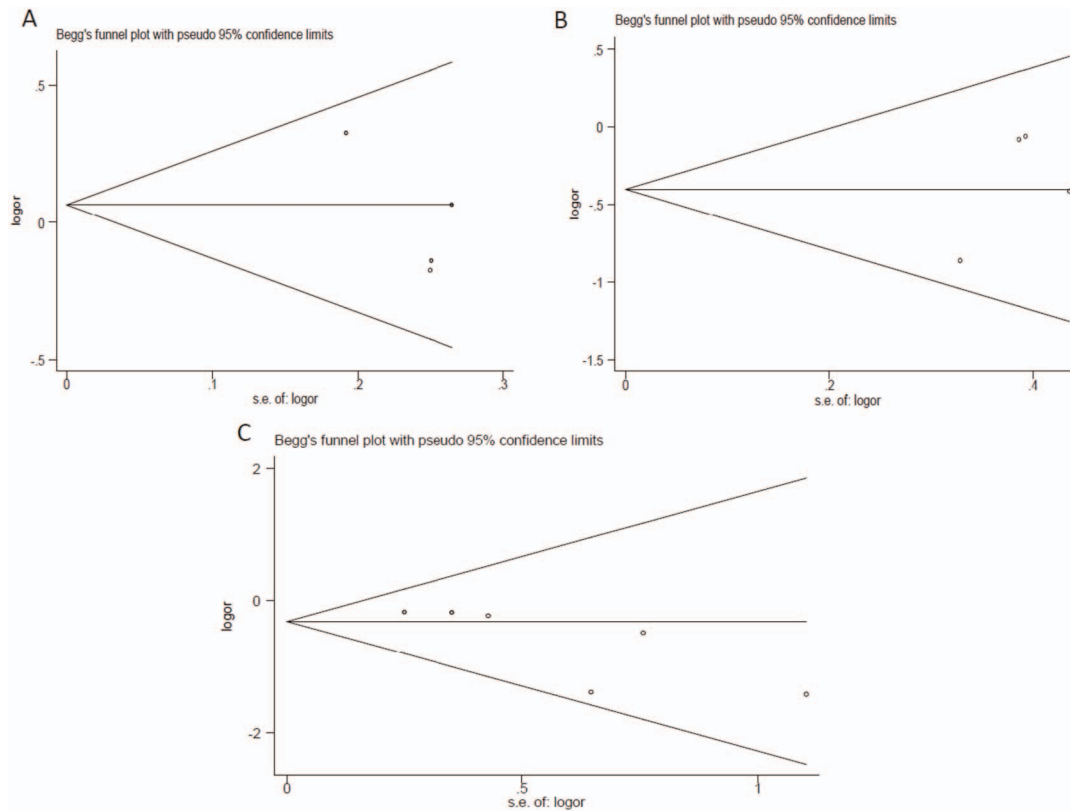

**Fig. 4. Begg's funnel plots for publication bias test for studies in subgroups.** A. colorectal cancer group; B. prostate cancer group; C. group with follow-up less than or equal to two years.

doi:10.1371/journal.pone.0114667.g004

exposure [12]. It is well known to all, immune suppression may assist the expansion of minimal residual disease after surgical resection, with the persistence of dormant tumor cells or circulating tumor cells, which will finally result in cancer recurrence and counteracted beneficial effect of surgery. However, Myles et al reported that EA in abdominal malignancies surgery was not associated with enhanced recurrence-free survival [28], and the similar result has been found in another two studies [27, 29]. Intriguingly, systematic results from population-based cohort studies and randomized clinical trials of other noncancerous surgeries suggested that EA might decrease the mortality, morbidity, and other severe complications when it is compared with GA [30–33]. The beneficial effect of EA on decreased cancer-recurrence and metastasis may be in accordance with the hypothesis that there is disturbance of immune defense mechanisms in patients undergoing cancer surgery, for example, neutrophils from patients undergoing surgery showed improved movement under spinal anesthesia when compared with GA [34]. Other possible explanation covers hemodynamic instability or compromise, surgical stress response, pain provocation, and recovery of spontaneous respiratory. During the inflammation, numerous mediators produced by leucocytes and endothelial cells will elicit pain, which can

be counteracted by the opioid peptides in the peripheral nerve terminals [35]. Inflammatory reactions rise in the destructed tissues, leading to the activation of pain receptors [36]. Immune compromise may exert effect on the rate of postoperative infection, duration of wound healing, treatment response, and tumor cell dissemination. Besides, surgical procedures and anesthesia techniques have been proved to be able to inhibit the activity of natural killer (NK) and functional T cells for several days [37–39]. Furthermore, in tumor microenvironment, Th1/Th2 balance is destroyed. Zhou et al demonstrated that EA is remarkably superior to GA in reversing this immunodeviation, and potentially exerts beneficial effect on hepatocellular cancer patients by enhancing anti-tumor Th1 polarization [40]. Due to the use of volatile anesthetics and opioids, the humoral and cellular immunity are suppressed, and thus the angiogenesis and micro-metastases occur. But propofol anesthesia reshapes the antitumoral effects by reducing the production of cyclooxygenase 2 and prostaglandins E2 from cancer cells [41]. Therefore, in order to improve clinical outcome of cancer patients, it is a practical strategy to preserve the immune function by using individualized therapeutic methods. The EGA method may contribute to the intact and sustained immunological function by reducing the dosage of anesthetic agents and thus lead to a better clinical outcome.

Nevertheless, since invasive techniques are being adopted minimally in general, and EA is being utilized less frequently, large scale randomized controlled clinical trials are unlikely to be performed to verify our theory. Generally speaking, the indications for EA have shrunk, and are restricted to certain high-risk patients, thoracotomy, major vascular and major upper abdominal surgery [42]. In our meta-analysis, there was no association between EGA and decreased overall cancer recurrence and metastasis, even in subgroup analysis for colon cancer. However, this association was significant within the subgroup of prostate cancer patients and subgroup with follow-up less than or equal to two years. Moreover, surgical outcome could be affected by multiple factors, so it is difficult to draw a conclusion for all cancer types and our hypothesis should be explained with caution, and there is no obvious evidence that simple alternation in the anesthesia practice would have a remarkable positive effect on postoperative survival of patients with cancer. What's more, considering the grossly heterogeneous data used across a range of different cancers, all findings should be interpreted cautiously. More prospective studies including standardized cancer patients, larger numbers of cases, unified anesthetic techniques, and systematic long-term follow-up are needed to demonstrate whether the association of EGA with decreased cancer recurrence and metastasis is causative.

## Supporting Information

### S1 PRISMA Checklist.

[doi:10.1371/journal.pone.0114667.s001](https://doi.org/10.1371/journal.pone.0114667.s001) (DOC)

## Acknowledgments

We would like to thank all the people who made contributions to this meta-analysis.

## Author Contributions

Conceived and designed the experiments: YGH LJP GT. Performed the experiments: LJP GT Lei Wang WJG BX XLG. Analyzed the data: Li Wang. Contributed reagents/materials/analysis tools: Lei Wang WJG BX XLG. Contributed to the writing of the manuscript: LJP GT HL. Reviewed the manuscript: YGH XHZ JZ JY ZHX.

## References

1. **Biki B, Mascha E, Moriarty DC, Fitzpatrick JM, Sessler DI, et al.** (2008) Anesthetic technique for radical prostatectomy surgery affects cancer recurrence: a retrospective analysis. *Anesthesiology* 109: 180–187.
2. **Exadaktylos AK, Buggy DJ, Moriarty DC, Mascha E, Sessler DI** (2006) Can anesthetic technique for primary breast cancer surgery affect recurrence or metastasis? *Anesthesiology* 105: 660.
3. **Forget P, Collet V, Lavand'homme P, De Kock M** (2010) Does analgesia and condition influence immunity after surgery? Effects of fentanyl, ketamine and clonidine on natural killer activity at different ages. *Eur J Anaesthesiol* 27: 233–240.
4. **Bar-Yosef S, Melamed R, Page GG, Shakhar G, Shakhar K, et al.** (2001) Attenuation of the tumor-promoting effect of surgery by spinal blockade in rats. *Anesthesiology* 94: 1066–1073.
5. **Snyder GL, Greenberg S** (2010) Effect of anaesthetic technique and other perioperative factors on cancer recurrence. *Br J Anaesth* 105: 106–115.
6. **Wuethrich PY, Schmitz S-FH, Kessler TM, Thalmann GN, Studer UE, et al.** (2010) Potential influence of the anesthetic technique used during open radical prostatectomy on prostate cancer-related outcome: a retrospective study. *Anesthesiology* 113: 570–576.
7. **Snyder G, Greenberg S** (2010) Effect of anaesthetic technique and other perioperative factors on cancer recurrence. *British journal of anaesthesia* 105: 106–115.
8. **Tsui BC, Rashiq S, Schopflocher D, Murtha A, Broemling S, et al.** (2010) Epidural anesthesia and cancer recurrence rates after radical prostatectomy. *Can J Anaesth* 57: 107–112.
9. **Sotunmbi P, Shittu O, Windokun A, Eyelade O** (1999) Combined general and epidural anaesthesia for excision of pheochromocytoma—a unique and safe technique. *African journal of medicine and medical sciences* 29: 319–322.
10. **Merquiol F, Montelimard A-S, Nourissat A, Molliex S, Zufferey PJ** (2013) Cervical epidural anesthesia is associated with increased cancer-free survival in laryngeal and hypopharyngeal cancer surgery: a retrospective propensity-matched analysis. *Regional anesthesia and pain medicine* 38: 398–402.
11. **Tsui BC, Rashiq S, Schopflocher D, Murtha A, Broemling S, et al.** (2010) Epidural anesthesia and cancer recurrence rates after radical prostatectomy. *Canadian Journal of Anesthesia/Journal canadien d'anesthésie* 57: 107–112.
12. **Cummings III KC, Xu F, Cummings LC, Cooper GS** (2012) A comparison of epidural analgesia and traditional pain management effects on survival and cancer recurrence after colectomy: a population-based study. *Anesthesiology* 116: 797–806.
13. **Gottschalk A, Ford JG, Regelin CC, You J, Mascha EJ, et al.** (2010) Association between epidural analgesia and cancer recurrence after colorectal cancer surgery. *Anesthesiology* 113: 27–34.

14. **Casati L, Fernández-Galinski S, Barrera E, Pol O, Puig MM** (2002) Isoflurane requirements during combined general/epidural anesthesia for major abdominal surgery. *Anesthesia & Analgesia* 94: 1331–1337.
15. **Wuethrich PY, Thalmann GN, Studer UE, Burkhard FC** (2013) Epidural analgesia during open radical prostatectomy does not improve long-term cancer-related outcome: a retrospective study in patients with advanced prostate cancer. *PLoS one* 8: e72873.
16. **Kaneda K, Takeuchi J, Yakushiji T, Kotani J** (2006) [A case of anesthesia for a patient with a huge pheochromocytoma accompanying difficulty in hemodynamics control]. *Masui* 55: 900–903.
17. **Sotunmbi PT, Shittu OB, Windokun A, Eyelade OA** (2000) Combined general and epidural anaesthesia for excision of phaeochromocytoma—a unique and safe technique. *Afr J Med Med Sci* 29: 319–322.
18. **Merquiol F, Montelimard AS, Nourissat A, Mollieux S, Zufferey PJ** (2013) Cervical epidural anesthesia is associated with increased cancer-free survival in laryngeal and hypopharyngeal cancer surgery: a retrospective propensity-matched analysis. *Reg Anesth Pain Med* 38: 398–402.
19. **Hiller JG, Hacking MB, Link EK, Wessels KL, Riedel BJ** (2014) Perioperative epidural analgesia reduces cancer recurrence after gastro-oesophageal surgery. *Acta Anaesthesiol Scand*.
20. **Wells G, Shea B, O'Connell D** (2011) The Newcastle-Ottawa Scale (NOS) for assessing the quality of nonrandomised studies in meta-analyses. Ottawa: Ottawa Hospital Research Institute; 2011. oxford. asp.
21. **Liberati A, Altman DG, Tetzlaff J, Mulrow C, Gotzsche PC, et al.** (2009) The PRISMA statement for reporting systematic reviews and meta-analyses of studies that evaluate health care interventions: explanation and elaboration. *PLoS Med* 6: e1000100.
22. **Higgins JP, Thompson SG** (2002) Quantifying heterogeneity in a meta-analysis. *Stat Med* 21: 1539–1558.
23. **Hiller J, Hacking M, Link E, Wessels K, Riedel B** (2014) Perioperative epidural analgesia reduces cancer recurrence after gastro-oesophageal surgery. *Acta anaesthesiologica Scandinavica* 58: 281–290.
24. **Christopherson R, James KE, Tableman M, Marshall P, Johnson FE** (2008) Long-term survival after colon cancer surgery: a variation associated with choice of anesthesia. *Anesthesia and analgesia* 107: 325–332.
25. **Mora S, Glynn RJ, Hsia J, MacFadyen JG, Genest J, et al.** (2010) Statins for the primary prevention of cardiovascular events in women with elevated high-sensitivity C-reactive protein or dyslipidemia results from the Justification for the Use of Statins in Prevention: an Intervention Trial Evaluating Rosuvastatin (JUPITER) and meta-analysis of women from primary prevention trials. *Circulation* 121: 1069–1077.
26. **Gupta A, Björnsson A, Fredriksson M, Hallböök O, Eintrei C** (2011) Reduction in mortality after epidural anaesthesia and analgesia in patients undergoing rectal but not colonic cancer surgery: a retrospective analysis of data from 655 patients in central Sweden. *British journal of anaesthesia* 107: 164–170.
27. **Binczak M, Tournay E, Billard V, Rey A, Jayr C** (2013) Major abdominal surgery for cancer: does epidural analgesia have a long-term effect on recurrence-free and overall survival? *Ann Fr Anesth Reanim* 32: e81–88.
28. **Myles PS, Peyton P, Silbert B, Hunt J, Rigg JR, et al.** (2011) Perioperative epidural analgesia for major abdominal surgery for cancer and recurrence-free survival: randomised trial. *BMJ* 342: d1491.
29. **Lacassie HJ, Cartagena J, Branes J, Assel M, Echevarria GC** (2013) The relationship between neuraxial anesthesia and advanced ovarian cancer-related outcomes in the Chilean population. *Anesth Analg* 117: 653–660.
30. **Rodgers A, Walker N, Schug S, McKee A, Kehlet H, et al.** (2000) Reduction of postoperative mortality and morbidity with epidural or spinal anaesthesia: results from overview of randomised trials. *BMJ* 321: 1493.
31. **Urwin SC, Parker MJ, Griffiths R** (2000) General versus regional anaesthesia for hip fracture surgery: a meta-analysis of randomized trials. *Br J Anaesth* 84: 450–455.
32. **Landoni G, Rodseth RN, Santini F, Ponschab M, Ruggeri L, et al.** (2012) Randomized evidence for reduction of perioperative mortality. *J Cardiothorac Vasc Anesth* 26: 764–772.

33. **Wijeysundera DN, Beattie WS, Austin PC, Hux JE, Laupacis A** (2008) Epidural anaesthesia and survival after intermediate-to-high risk non-cardiac surgery: a population-based cohort study. *Lancet* 372: 562–569.
34. **Erskine R, Janicki PK, Ellis P, James MF** (1992) Neutrophils from patients undergoing hip surgery exhibit enhanced movement under spinal anaesthesia compared with general anaesthesia. *Can J Anaesth* 39: 905–910.
35. **Rittner H, Brack A, Stein C** (2008) Pain and the immune system. *British journal of anaesthesia* 101: 40–44.
36. **Rittner H, Brack A, Stein C** (2002) [Pain and the immune system: friend or foe?]. *Der Anaesthesist* 51: 351–358.
37. **Lewis JW, Shavit Y, Terman GW, Gale RP, Liebeskind JC** (1983) Stress and morphine affect survival of rats challenged with a mammary ascites tumor (MAT 13762B). *Nat Immun Cell Growth Regul* 3: 43–50.
38. **Beilin B, Martin FC, Shavit Y, Gale RP, Liebeskind JC** (1989) Suppression of natural killer cell activity by high-dose narcotic anesthesia in rats. *Brain Behav Immun* 3: 129–137.
39. **Markovic SN, Knight PR, Murasko DM** (1993) Inhibition of interferon stimulation of natural killer cell activity in mice anesthetized with halothane or isoflurane. *Anesthesiology* 78: 700–706.
40. **Zhou D, Gu FM, Gao Q, Li QL, Zhou J, et al.** (2012) Effects of anesthetic methods on preserving anti-tumor T-helper polarization following hepatectomy. *World J Gastroenterol* 18: 3089–3098.
41. **Fodale V, D'Arrigo MG, Triolo S, Mondello S, La Torre D** (2014) Anesthetic techniques and cancer recurrence after surgery. *ScientificWorldJournal* 2014: 328513.
42. **Lirk P, Hollmann M** (2013) Outcome after regional anesthesia: weighing risks and benefits. *Minerva Anesthesiol.*
